# Supplementary material for: Identifying Triple-Negative Breast Cancer Using Background Parenchymal Enhancement Heterogeneity on Dynamic Contrast-Enhanced MRI: A Pilot Radiomics Study
Source: PLoS One. 2015 Nov 24;10(11):e0143308. doi: 10.1371/journal.pone.0143308 (PMC4658011; doi:10.1371/journal.pone.0143308)
Supplement: S1 Table — Details of imaging features selected as most discriminative in prediction models. Feature values (or numbers, with categorical features) are presented with their support vector machine (SVM) weights. Bootstrap estimates of SVM weights indicate prognostic significance, where the larger in absolute magnitude the weight, the more significant the feature (features were normalized with use of SVM classifier, though are presented here in their original scale). Features are listed alphabetically by differentiation task and model type. TN = Triple-negative, LumA = Luminal A, LumB = Luminal B, SVM = support vector machine, BPE = background parenchymal enhancement, std = standard deviation, n/a = not applicable, PE = percent enhancement, SER = signal enhancement ratio. (XLSX) [file pone.0143308.s002.xlsx]

## Sheet: Sheet1
	Supplemental Table: Optimal imaging feature distribution and prognostic significance
	Details of imaging features selected as most discriminative in prediction models. Feature values (or numbers, with categorical features) are presented with their support vector machine (SVM) weights. Bootstrap estimates of SVM weights indicate prognostic significance, where the larger in absolute magnitude the weight, the more significant the feature (features were normalized with use of SVM clas…
	Differentiation task	Model type	Feature	Feature value				SVM weight
				TN		Alternate subtype
				mean/n	std	mean/n	std	mean	std
	TN vs others	tumor	mass enhancement characteristics = heterogenous	2		29		0.110433	0.0633712
			mass enhancement characteristics = n/a	1		10		-0.04669	0.0975655
			mass enhancement characteristics = rim enhancement	7		36		-0.08583	0.0462778
			mass margin = irregular (or spiculated)	9 (0)		35 (30)		0.44331	0.146783
			mass shape = irregular	0		37		0.23692	0.150764
			mass shape = lobulated	6		15		-0.07429	0.085832
			mass shape = oval	3		8		-0.35894	0.145064
			mass shape = round	0		5		0.218078	0.0843938
			mass size	27.556	17.629	15.538	6.534	-1.37717	0.337765
			tumor PE std	44.173	20.093	44.043	27.69	0.02714	0.0983429
			tumor rate in Energy	0.133	0.06	0.129	0.069	-0.14774	0.139225
			tumor rate in Inertia	3.21	0.557	3.19	0.563	0.25438	0.187749
			tumor SER mean	0.992	0.213	1.027	0.223	0.64787	0.139927
		tumor + BPE	mass shape = irregular	0		37		0.36311	0.119572
			mass shape = lobulated	6		15		-0.45848	0.114039
			mass shape = oval	3		8		-0.58892	0.068488
			mass shape = round	0		5		0.760333	0.0756979
			parenchyma PE ClusterShade	0.271	0.126	0.166	0.099	-1.09614	0.129875
			parenchyma PE Homogeneity	13.555	9.716	8.764	7.463	-0.21552	0.110391
			parenchyma rate in std	218.423	79.792	155.916	39.941	-1.05216	0.263056
			parenchyma SER skewness	2.479	1.576	0.824	0.704	-2.04385	0.176105
			parenchyma SER Variance	0.283	0.039	0.251	0.02	-1.26093	0.174376
	TN vs ER+	tumor	breast density	38.095	19.487	29.126	12.121	-0.70382	0.268275
			mass enhancement characteristics = heterogenous	2		29		0.101691	0.0605711
			mass enhancement characteristics = n/a	1		10		-0.02926	0.0669343
			mass enhancement characteristics = rim enhancement	7		32		-0.08259	0.0359661
			mass margin = irregular (or spiculated)	9 (0)		32 (29)		0.68143	0.188902
			mass shape = irregular	0		33		0.35163	0.0886912
			mass shape = lobulated	6		15		-0.11359	0.0860923
			mass shape = oval	3		8		-0.37361	0.0920285
			mass shape = round	0		5		0.13559	0.0814543
			mass size	27.556	17.629	15.59	6.484	-1.49774	0.234704
			tumor PE Inertia	2.858	1.348	3.224	0.978	0.03808	0.126871
			tumor PE skewness	0.881	1.199	1.147	3.111	0.13067	0.118223
			tumor rate in Homogeneity	71.528	32.619	103.464	63.964	0.31317	0.124128
			tumor rate in Inertia	3.21	0.557	3.185	0.57	0.43389	0.207382
			tumor SER mean	0.992	0.213	1.027	0.202	0.70969	0.138709
		tumor + BPE	mass shape = irregular	0		33		0.3882	0.135164
			mass shape = lobulated	6		15		-0.47169	0.0853698
			mass shape = oval	3		8		-0.61367	0.100112
			mass shape = round	0		5		0.774644	0.0568414
			parenchyma PE ClusterShade	0.271	0.126	0.164	0.097	-1.09189	0.119559
			parenchyma PE Homogeneity	13.555	9.716	8.544	7.36	-0.1934	0.143284
			parenchyma rate in std	218.423	79.792	154.28	39.607	-1.09565	0.18903
			parenchyma SER skewness	2.479	1.576	0.821	0.708	-2.05213	0.168306
			parenchyma SER Variance	0.283	0.039	0.251	0.02	-1.28447	0.171778
	TN vs PR+	tumor	breast density	38.095	19.487	27.856	11.274	-0.75439	0.259356
			mass shape = irregular	0		29		0.47093	0.100481
			mass shape = lobulated	6		14		-0.10597	0.0644603
			mass shape = oval	3		7		-0.36566	0.0611747
			mass shape = round	0		5		0.001775	0.00355
			mass size	27.556	17.629	15.709	6.652	-1.36032	0.257538
			morphology = mass (or non-mass)	9 (2)		55 (8)		-0.34496	0.0294418
			tumor PE mean	149.628	33.864	156.046	36.605	0.27818	0.148939
			tumor SER mean	0.992	0.213	1.033	0.203	0.53556	0.177116
		tumor + BPE	mass shape = irregular	0		29		0.33274	0.143645
			mass shape = lobulated	6		14		-0.30476	0.0911753
			mass shape = oval	3		7		-0.24944	0.107179
			mass shape = round	0		5		0.22149	0.0900924
			parenchyma PE Entropy	0.488	0.185	0.317	0.163	-0.77379	0.19938
			parenchyma rate in std	218.423	79.792	154.959	41.188	-1.0521	0.21569
			parenchyma SER skewness	2.479	1.576	0.856	0.696	-1.93117	0.168398
			tumor PE mean	149.628	33.864	156.046	36.605	0.48452	0.165949
	TN vs LumA	tumor	mass enhancement characteristics = heterogenous	2		24		0.192436	0.137179
			mass enhancement characteristics = n/a	1		7		0.23842	0.169161
			mass enhancement characteristics = rim enhancement	7		13		-0.45006	0.107256
			mass shape = irregular	0		21		0.38611	0.0588286
			mass shape = lobulated	6		7		-0.35791	0.127885
			mass shape = oval	3		6		-0.27331	0.130573
			mass shape = round	0		3		0.24511	0.109966
			mass size	27.556	17.629	14.568	5.305	-1.42805	0.232367
			morphology = mass (or non-mass)	9 (2)		37 (8)		-0.53442	0.243365
			tumor PE Homogeneity	13.555	9.716	34.02	26.408	0.85124	0.199945
		tumor + BPE	mass shape = irregular	0		21		0.07684	0.050288
			mass shape = lobulated	6		7		-0.40442	0.0295815
			mass shape = oval	3		6		-0.21069	0.097334
			mass shape = round	0		3		0.53826	0.118885
			parenchyma rate in std	218.423	79.792	147.327	40.114	-1.68121	0.237229
			parenchyma SER skewness	2.479	1.576	0.906	0.689	-1.60384	0.181283
	TN vs LumB	tumor	mass margin = irregular (or spiculated)	9 (0)		16 (8)		0.49135	0.198018
			mass shape = irregular	0		12		0.75359	0.239978
			mass shape = lobulated	6		8		0.03408	0.252658
			mass shape = oval	3		2		-0.90436	0.437472
			mass shape = round	0		2		0.166671	0.193649
			mass size	27.556	17.629	17.167	7.833	-1.38896	0.465013
			tumor PE Variance	0.483	0.243	0.395	0.2	-0.50504	0.33147
		tumor + BPE	parenchyma rate in Energy	0.671	0.173	0.824	0.143	0.63721	0.187353
			parenchyma SER skewness	2.479	1.576	0.683	0.73	-1.57359	0.23936
			parenchyma SER Variance	0.283	0.039	0.249	0.005	-1.88678	0.189654
			tumor PE Variance	0.483	0.243	0.395	0.2	-0.44728	0.0617321
	Features are listed alphabetically by differentiation task and model type. TN=Triple-negative, LumA=Luminal A, LumB=Luminal B, SVM=support vector machine, BPE=background parenchymal enhancement, std=standard deviation, n/a=not applicable, PE=percent enhancement, SER=signal enhancement ratio.
